# Supplementary material for: Temperament and character effects on late adolescents’ well-being and emotional-behavioural difficulties
Source: PeerJ. 2018 Mar 27;6:e4484. doi: 10.7717/peerj.4484 (PMC5877450; doi:10.7717/peerj.4484)
Supplement: Data S1 [file peerj-06-4484-s001.xlsx]

## Sheet: WorryMind_WIDE
Participant	Sex	Years	Grade	School	NS_Miss	HA_Miss	RD_Miss	P_Miss	SD_Miss	C_Miss	ST_Miss	WB_Miss	AU_Miss	EM_Miss	PG_Miss	PR_Miss	PL_Miss	SA_Miss	Pa_Miss	Na_Miss	TOT_Miss	INT_Miss	EXT_Miss	EMO_Miss	BEH_Miss	HYP_Miss	PEE_Miss	PRO_Miss	IMP_Miss	NS_raw	HA_raw	RD_raw	P_raw	SD_raw	C_raw	ST_raw	WB_raw	AU_raw	EM_raw	PG_raw	PR_raw	PL_raw	SA_raw	Pa_raw	Na_raw	TOT_raw	INT_raw	EXT_raw	EMO_raw
WM001	Female	18	4th	Lignano	0	0	0	0	0	0	0	0	0	0	0	0	0	0	0	0	0	0	0	0	0	0	0	0	0	16	5	9	1	18	18	12	372	60	54	75	52	68	63	27	26	17	5	12	5
WM002	Male	18	4th	Lignano	0	0	0	0	0	0	0	0	0	0	0	0	0	0	0	0	0	0	0	0	0	0	0	0	0	12	4	2	1	16	14	0	408	73	65	69	61	61	79	32	19	7	4	3	2
WM003	Female	18	4th	Lignano	0	0	0	0	0	0	0	0	0	0	0	0	0	0	0	0	0	0	0	0	0	0	0	0	0	10	7	4	5	10	12	13	323	74	40	67	41	51	50	26	27	21	10	11	5
WM004	Female	18	4th	Lignano	0	0	0	0	0	0	0	1	0	0	0	0	0	1	0	0	0	0	0	0	0	0	0	0	0	7	17	9	4	5	16	8	269.205	38	48	54	41	49	38.7692	32	28	18	11	7	4
WM005	Female	18	4th	Lignano	0	0	0	0	0	0	0	0	0	0	0	0	0	0	0	0	0	0	0	0	0	0	0	0	0	11	8	9	4	25	21	5	413	76	58	75	64	76	64	38	14	10	5	5	3
WM006	Female	18	4th	Lignano	0	0	0	0	0	0	0	0	0	0	0	0	0	0	0	0	0	0	0	0	0	0	0	0	0	13	3	3	3	16	16	3	308	76	51	64	45	33	39	43	20	20	10	10	4
WM007	Female	20	4th	Lignano	0	0	0	0	0	0	0	0	0	0	0	0	0	0	0	0	0	0	0	0	0	0	0	0	0	10	9	4	2	18	10	4	357	75	53	74	52	50	53	37	12	10	6	4	2
WM008	Female	18	4th	Lignano	0	0	0	0	0	0	0	0	0	0	0	0	0	0	0	0	0	0	0	0	0	0	0	0	0	9	9	6	5	13	19	10	380	68	61	68	60	66	57	38	15	16	7	9	4
WM009	Female	18	4th	Lignano	0	0	0	0	0	0	0	0	0	0	0	0	0	0	0	0	0	0	0	0	0	0	0	0	0	6	15	8	3	12	16	0	311	52	44	53	73	50	39	27	15	16	7	9	6
WM010	Male	18	4th	Lignano	0	0	0	0	0	0	0	0	0	0	0	0	0	0	0	0	0	0	0	0	0	0	0	0	NA	8	13	2	4	15	17	5	372	73	57	67	52	63	60	34	15	8	5	3	2
WM011	Female	18	4th	Lignano	0	0	0	0	0	0	0	0	0	0	0	0	0	0	0	0	0	0	0	0	0	0	0	0	0	7	20	3	5	5	14	6	233	62	27	54	26	40	24	17	31	25	18	7	10
WM012	Female	18	4th	Lignano	0	0	0	0	0	0	0	0	0	0	0	0	0	0	0	0	0	0	0	0	0	0	0	0	NA	10	11	10	2	20	22	10	411	66	56	74	64	71	80	28	11	11	5	6	3
WM013	Male	18	4th	Lignano	0	0	0	0	0	0	0	0	0	0	0	0	0	0	0	0	0	0	0	0	0	0	0	0	0	10	3	7	1	12	23	10	327	51	51	64	56	57	48	36	21	13	6	7	2
WM014	Female	18	4th	Lignano	0	0	0	0	0	0	0	0	0	0	0	0	0	0	0	0	0	0	0	0	0	0	0	0	0	13	9	10	3	7	11	5	315	34	46	57	65	61	52	29	17	11	3	8	3
WM015	Female	18	4th	Lignano	0	0	0	0	0	0	0	0	0	0	0	0	0	0	0	0	0	0	0	0	0	0	0	0	0	10	9	7	0	11	14	4	300	55	54	62	51	37	41	27	19	12	5	7	4
WM016	Male	18	4th	Lignano	0	0	0	1	0	0	0	2	0	0	0	1	0	1	0	0	0	0	0	0	0	0	0	0	0	7	9	10	3.75	11	22	8	321.659	60	48	55	53.8462	55	49.5385	38	36	18	9	9	6
WM017	Male	20	4th	Lignano	0	0	0	0	0	0	0	0	0	0	0	0	0	0	0	0	0	0	0	0	0	0	0	0	0	14	10	8	2	15	5	6	304	68	33	62	59	40	42	28	28	22	9	13	5
WM018	Female	18	4th	Lignano	0	1	0	0	0	0	0	0	0	0	0	0	0	0	0	0	0	0	0	0	0	0	0	0	0	13	6.31579	10	0	19	21	10	421	64	68	68	80	67	74	35	20	8	3	5	1
WM019	Male	18	4th	Lignano	0	0	0	0	0	0	0	0	0	0	0	0	0	0	0	0	0	0	0	0	0	0	0	0	0	16	1	7	4	21	19	8	433	74	74	65	83	69	68	33	11	7	1	6	1
WM020	Female	18	4th	Lignano	0	0	0	0	0	0	0	0	0	0	0	0	0	0	0	0	0	0	0	0	0	0	0	0	0	9	17	11	3	14	20	4	355	61	49	58	75	57	55	39	17	17	8	9	6
WM021	Male	17	3rd	Lignano	0	0	0	0	0	0	0	0	0	0	0	0	0	0	0	0	0	0	0	0	0	0	0	0	0	12	10	12	0	14	17	5	329	53	48	57	76	44	51	22	13	10	3	7	2
WM022	Male	17	3rd	Lignano	0	0	0	0	0	0	0	0	0	0	0	0	0	0	0	0	0	0	0	0	0	0	0	0	0	9	15	7	2	10	20	9	364	60	57	67	60	64	56	28	18	9	3	6	3
WM023	Male	19	3rd	Lignano	0	0	0	0	0	0	0	0	0	0	0	0	0	0	0	1	0	0	0	0	0	0	0	0	0	5	14	9	1	11	14	5	288	49	51	50	41	51	46	23	15.5556	15	10	5	5
WM024	Female	17	3rd	Lignano	0	0	0	0	0	0	0	0	0	0	0	0	0	0	0	0	0	0	0	0	0	0	0	0	0	11	10	12	3	14	17	7	368	60	68	61	75	59	45	30	15	19	11	8	8
WM025	Female	16	3rd	Lignano	0	0	0	0	0	0	0	0	0	0	0	0	0	0	0	0	0	0	0	0	0	0	0	0	0	11	5	4	5	14	11	12	394	72	67	73	44	66	72	43	16	14	4	10	1
WM026	Male	17	3rd	Lignano	0	0	0	0	0	0	0	0	0	0	0	0	0	0	0	0	0	0	0	0	0	0	0	0	0	4	20	6	0	2	9	8	243	35	41	36	46	61	24	35	22	25	16	9	10
WM027	Female	17	3rd	Lignano	0	0	0	0	0	1	0	0	0	0	0	0	0	0	0	0	0	0	0	0	0	0	0	0	0	7	15	13	4	11	18.75	7	313	43	53	69	52	58	38	36	23	19	13	6	8
WM028	Male	18	3rd	Lignano	0	0	0	0	0	0	0	0	0	0	0	0	0	0	0	0	0	0	0	0	0	0	0	0	0	10	12	7	4	17	20	7	396	73	63	67	69	68	56	24	29	11	6	5	4
WM029	Male	17	3rd	Lignano	0	0	0	0	0	0	0	2	0	0	0	0	1	1	0	0	0	0	0	0	0	0	0	0	0	12	8	9	2	14	16	11	361.61	58	51	65	70	66.7692	50.6154	39	15	10	4	6	3
WM030	Female	17	3rd	Lignano	0	0	0	0	0	0	0	0	0	0	0	0	0	0	0	0	0	0	0	0	0	0	0	0	0	7	11	4	4	15	16	6	364	65	61	75	40	63	60	32	23	19	11	8	7
WM031	Female	18	3rd	Lignano	0	0	0	0	0	0	0	0	0	0	0	0	0	0	0	0	0	0	0	0	0	0	0	0	0	11	18	8	3	4	22	14	238	42	33	53	43	41	26	23	45	24	13	11	8
WM032	Male	17	3rd	Lignano	0	0	0	0	0	0	0	0	0	0	0	0	0	0	0	0	0	0	0	0	0	0	0	0	0	10	8	5	2	12	18	3	337	60	49	71	64	48	45	25	11	7	0	7	0
WM033	Male	17	3rd	Lignano	0	0	0	0	0	0	0	0	0	0	0	0	0	0	0	0	0	0	0	0	0	0	0	0	0	5	4	5	5	25	20	3	404	71	70	68	53	76	66	40	14	8	6	2	2
WM034	Male	18	3rd	Lignano	0	0	0	0	0	0	0	0	0	0	0	0	0	0	0	0	0	0	0	0	0	0	0	0	0	15	7	7	3	13	14	2	316	53	57	53	52	48	53	35	14	23	8	15	3
WM035	Female	18	4th	Latisana	0	0	0	1	0	0	0	0	0	0	0	0	0	0	0	0	0	0	0	0	0	0	0	0	0	6	20	10	5	17	20	10	361	57	60	71	62	65	46	28	22	14	6	8	6
WM036	Male	18	4th	Latisana	0	0	1	0	0	0	0	0	0	0	0	0	0	0	0	0	0	0	0	0	0	0	0	0	NA	9	5	3.21429	5	21	18	4	409	67	70	70	59	73	70	38	13	1	1	0	0
WM037	Male	18	4th	Latisana	0	0	0	0	0	0	0	0	0	0	0	0	0	0	0	0	0	0	0	0	0	0	0	0	0	3	12	5	5	12	7	4	307	56	47	53	47	64	40	27	30	14	4	10	2
WM038	Female	18	4th	Latisana	0	0	0	0	0	0	0	0	0	0	0	0	0	0	0	0	0	0	0	0	0	0	0	0	0	10	5	8	5	19	18	10	402	64	69	72	66	70	61	44	18	3	2	1	0
WM039	Female	18	4th	Latisana	0	0	0	0	0	0	0	0	0	0	0	0	0	0	0	0	0	0	0	0	0	0	0	0	0	4	17	5	4	11	20	9	311	51	51	54	47	58	50	26	23	15	9	6	5
WM040	Male	19	4th	Latisana	0	0	0	0	0	0	0	0	0	0	0	0	0	0	0	0	0	0	0	0	0	0	0	0	0	13	8	5	2	24	22	3	370	73	60	62	60	58	57	17	10	6	1	5	0
WM041	Female	18	4th	Latisana	0	0	0	0	0	0	0	1	0	0	0	0	1	0	0	0	0	0	0	0	0	0	0	0	0	8	19	11	4	10	21	7	266.169	38	46	55	56	46.3077	25	25	36	19	12	7	9
WM042	Male	18	4th	Latisana	0	0	0	0	0	0	0	1	0	0	0	1	0	0	0	0	0	0	0	0	0	0	0	0	NA	7	6	4	1	16	14	4	332.964	58	61	56	64.6154	45	49	35	16	28	11	17	3
WM043	Female	18	4th	Latisana	0	0	0	0	0	0	0	0	0	0	0	0	0	0	0	0	0	0	0	0	0	0	0	0	0	3	9	9	3	13	22	6	312	52	50	70	34	56	50	33	16	9	7	2	2
WM044	Male	18	4th	Latisana	0	0	0	0	0	0	0	0	0	0	0	0	0	0	0	0	0	0	0	0	0	0	0	0	0	10	5	7	3	22	17	3	379	65	61	64	63	61	65	37	19	9	3	6	2
WM045	Male	18	4th	Latisana	0	0	0	0	0	0	0	0	0	0	0	0	0	0	0	0	0	0	0	0	0	0	0	0	0	7	17	12	1	17	22	8	347	46	47	61	75	59	59	30	21	11	6	5	2
WM046	Female	17	3rd	Latisana	0	0	0	0	0	0	0	0	0	0	0	0	0	0	0	0	0	0	0	0	0	0	0	0	0	13	19	7	0	5	14	5	288	57	39	63	51	44	34	24	30	24	14	10	9
WM047	Female	17	3rd	Latisana	2	NA	NA	NA	NA	NA	NA	0	0	0	0	0	0	0	0	0	0	0	0	0	0	0	0	0	0	11.1111	NA	NA	NA	NA	NA	NA	390	76	55	68	67	59	65	33	14	11	4	7	4
WM048	Female	17	3rd	Latisana	0	0	0	0	0	0	0	0	0	0	0	0	0	0	0	0	0	0	0	0	0	0	0	0	0	6	19	10	4	15	17	3	317	49	52	54	65	48	49	24	27	15	8	7	6
WM049	Female	17	3rd	Latisana	0	0	0	0	0	0	0	0	0	0	0	0	0	0	0	0	0	0	0	0	0	0	0	0	0	6	19	6	5	18	18	5	333	73	44	53	56	69	38	22	28	17	12	5	8
WM050	Male	17	3rd	Latisana	0	1	0	0	1	0	0	1	0	0	0	0	1	0	0	0	0	0	0	0	0	0	0	0	0	11	6.31579	8	0	20.8333	23	10	423.036	61	65	82	72	72.1538	71	29	12	9	4	5	1
WM051	Male	17	3rd	Latisana	0	0	0	0	0	0	0	0	0	0	0	0	0	0	0	0	0	0	0	0	0	0	0	0	0	8	6	9	3	22	17	6	364	58	58	69	66	55	58	25	16	4	0	4	0
WM052	Male	17	3rd	Latisana	0	0	0	0	0	0	0	0	0	0	0	0	0	0	0	0	0	0	0	0	0	0	0	0	0	14	5	7	0	21	8	2	382	69	60	62	75	59	57	32	18	10	4	6	2
WM053	Female	17	3rd	Latisana	0	0	0	0	0	0	0	0	0	0	0	0	0	0	0	0	0	0	0	0	0	0	0	0	0	6	20	9	1	6	15	1	270	39	46	50	55	47	33	17	23	18	12	6	10
WM054	Female	16	3rd	Latisana	0	0	0	0	0	0	0	0	0	0	0	0	0	0	0	0	0	0	0	0	0	0	0	0	NA	10	15	9	0	13	20	8	393	66	68	64	63	62	70	30	13	18	9	9	4
WM055	Female	16	3rd	Latisana	0	0	0	0	0	0	0	0	0	0	0	0	0	0	0	0	0	0	0	0	0	0	0	0	0	17	6	9	3	17	21	6	343	63	54	63	63	51	49	25	22	14	5	9	5
WM056	Female	17	3rd	Latisana	0	0	0	0	0	0	0	0	0	0	0	0	0	0	0	0	0	0	0	0	0	0	0	0	0	3	13	5	2	11	19	4	294	55	43	52	52	47	45	14	31	19	13	6	7
WM057	Female	17	3rd	Latisana	0	0	0	0	0	0	0	0	0	0	0	0	0	0	0	0	0	0	0	0	0	0	0	0	0	15	16	12	0	6	14	12	256	42	36	49	49	50	30	15	27	25	13	12	9
WM058	Male	17	3rd	Latisana	0	0	0	0	0	0	0	1	0	1	0	0	0	0	0	0	0	0	0	0	0	0	0	0	0	10	19	10	3	9	23	10	312.723	39	49.5385	59	57	53	55	26	18	13	6	7	4
WM059	Female	17	3rd	Latisana	0	0	0	0	0	0	0	0	0	0	0	0	0	0	0	0	0	0	0	0	0	0	0	0	0	7	14	10	3	24	20	6	382	58	64	56	69	66	69	37	16	5	1	4	1
WM060	Female	17	3rd	Latisana	0	0	0	0	0	0	0	0	0	0	0	0	0	0	0	0	0	0	0	0	0	0	0	0	0	11	15	11	1	12	17	2	314	64	48	55	39	55	53	23	19	21	10	11	4
WM061	Female	17	3rd	Latisana	0	0	0	0	0	0	0	0	0	0	0	0	0	0	0	0	0	0	0	0	0	0	0	0	0	12	14	10	2	17	19	3	346	64	49	74	58	60	41	25	16	9	4	5	2
WM062	Female	17	3rd	Latisana	0	0	0	0	0	0	0	0	0	0	0	0	0	0	0	0	0	0	0	0	0	0	0	0	0	10	13	8	0	13	20	6	328	56	47	67	64	50	44	26	28	20	8	12	7
WM063	Male	18	3rd	Latisana	0	0	0	0	0	0	0	0	0	0	0	0	0	0	0	0	0	0	0	0	0	0	0	0	0	11	8	4	2	18	10	3	281	59	45	53	33	50	41	25	16	19	10	9	4
WM064	Female	17	3rd	Latisana	0	0	0	0	0	0	0	0	0	0	0	0	0	0	0	0	0	0	0	0	0	0	0	0	0	4	10	1	3	13	11	11	353	75	64	61	43	52	58	32	17	12	8	4	3
WM065	Female	17	3rd	Latisana	0	0	0	0	0	0	0	0	0	0	0	0	0	0	0	0	0	0	0	0	0	0	0	0	0	7	14	7	4	21	19	8	415	71	67	77	68	73	59	31	16	7	5	2	3
WM066	Female	17	3rd	Latisana	0	0	0	0	0	0	0	0	0	0	0	0	0	0	0	0	0	0	0	0	0	0	0	0	0	11	8	9	2	12	20	6	362	60	62	66	63	62	49	28	14	8	4	4	2
WM067	Female	17	3rd	Latisana	0	0	0	0	0	0	0	0	0	0	0	0	0	0	0	0	0	0	0	0	0	0	0	0	NA	1	10	8	3	24	23	11	390	60	70	63	65	73	59	28	17	9	7	2	5
WM068	Female	17	3rd	Latisana	0	0	0	0	0	0	0	0	0	0	0	0	0	0	0	0	0	0	0	0	0	0	0	0	0	15	19	9	3	7	19	4	261	42	41	48	59	40	31	19	34	22	10	12	8
WM069	Female	17	3rd	Latisana	0	0	0	0	1	0	0	1	0	0	0	0	1	0	0	0	0	0	0	0	0	0	0	0	0	14	14	8	5	9.375	15	6	294.506	59	38	60	66	44.1538	27	20	35	22	10	12	8
WM070	Female	17	3rd	Latisana	0	0	0	0	0	0	0	0	0	0	0	0	0	0	0	0	0	0	0	0	0	0	0	0	NA	6	10	11	5	23	20	12	434	72	70	73	79	76	64	35	16	10	8	2	4
WM071	Female	17	3rd	Latisana	0	0	0	0	1	0	0	0	0	0	0	0	0	0	0	0	0	0	0	0	0	0	0	0	0	8	12	8	3	13.5417	20	5	282	45	49	49	48	47	44	31	18	17	8	9	6
WM072	Female	17	3rd	Latisana	0	0	0	0	0	1	0	0	0	0	0	0	0	0	0	0	0	0	0	0	0	0	0	0	0	9	12	14	4	12	19.7917	12	317	36	47	53	62	60	59	27	36	21	11	10	8
[truncated: 15 more columns]
